# Supplementary material for: Clinical Neuroimaging Findings in Catatonia: Neuroradiological Reports of MRI Scans of Psychiatric Inpatients With and Without Catatonia
Source: Atypon-hosted journal article supplement (doi:10.1176/appi.neuropsych.21070181), 2022-04-13
Supplement: appi.neuropsych.21070181.ds001.pdf [file appi.neuropsych.21070181.ds001.pdf]

## Supplementary Material

Table S1: Comparison of observed and imputed data for key variables

| Variable                               | Observed data                    |               | Imputed data (across 20 datasets) |                |
|----------------------------------------|----------------------------------|---------------|-----------------------------------|----------------|
|                                        | Total number of values, <i>N</i> | <i>n</i> (%)  | Total number of values, <i>N</i>  | <i>n</i> (%)   |
| <b>Sex, male</b>                       | 26,408                           | 14,298 (54.1) | 80                                | 47 (58.8)      |
| <b>Ethnicity, Black</b>                | 26,019                           | 6,816 (26.2)  | 7860                              | 1866 (23.7)    |
| <b>Valid MRI scan report, abnormal</b> | 790                              | 365 (46.2)    | 512,440                           | 226,128 (44.1) |
|                                        |                                  |               |                                   |                |
|                                        | Total number of values, <i>N</i> | Mean (SD)     | Total number of values, <i>N</i>  | Mean (SD)      |
| <b>Age at scan</b>                     | 1904                             | 43.5 (19.4)   | 490,160                           | 41.4 (17.1)    |

Table S2: STROBE checklist for case-control studies

|                           | Item No | Recommendation                                                                                                                                                      | Location              |
|---------------------------|---------|---------------------------------------------------------------------------------------------------------------------------------------------------------------------|-----------------------|
| <b>Title and abstract</b> | 1       | (a) Indicate the study's design with a commonly used term in the title or the abstract                                                                              | Abstract: Methods     |
|                           |         | (b) Provide in the abstract an informative and balanced summary of what was done and what was found                                                                 | Abstract: Methods     |
| <b>Introduction</b>       |         |                                                                                                                                                                     |                       |
| Background/rationale      | 2       | Explain the scientific background and rationale for the investigation being reported                                                                                | Introduction          |
| Objectives                | 3       | State specific objectives, including any prespecified hypotheses                                                                                                    | Introduction          |
| <b>Methods</b>            |         |                                                                                                                                                                     |                       |
| Study design              | 4       | Present key elements of study design early in the paper                                                                                                             | Methods: Study design |
| Setting                   | 5       | Describe the setting, locations, and relevant dates, including periods of recruitment, exposure, follow-up, and data collection                                     | Methods               |
| Participants              | 6       | (a) Give the eligibility criteria, and the sources and methods of case ascertainment and control selection. Give the rationale for the choice of cases and controls | Methods: Exposure     |
|                           |         | (b) For matched studies, give matching criteria and the number of controls per case                                                                                 | N/A                   |

|                              |     |                                                                                                                                                                                                   |                                                  |
|------------------------------|-----|---------------------------------------------------------------------------------------------------------------------------------------------------------------------------------------------------|--------------------------------------------------|
| Variables                    | 7   | Clearly define all outcomes, exposures, predictors, potential confounders, and effect modifiers. Give diagnostic criteria, if applicable                                                          | Methods                                          |
| Data sources/<br>measurement | 8*  | For each variable of interest, give sources of data and details of methods of assessment (measurement). Describe comparability of assessment methods if there is more than one group              | Methods:<br>Outcome,<br>Exposure,<br>Confounders |
| Bias                         | 9   | Describe any efforts to address potential sources of bias                                                                                                                                         | Methods                                          |
| Study size                   | 10  | Explain how the study size was arrived at                                                                                                                                                         | Methods                                          |
| Quantitative<br>variables    | 11  | Explain how quantitative variables were handled in the analyses. If applicable, describe which groupings were chosen and why                                                                      | Methods:<br>Confounders                          |
| Statistical methods          | 12  | (a) Describe all statistical methods, including those used to control for confounding                                                                                                             | Methods:<br>Statistical<br>analysis              |
|                              |     | (b) Describe any methods used to examine subgroups and interactions                                                                                                                               | Methods:<br>Statistical<br>analysis              |
|                              |     | (c) Explain how missing data were addressed                                                                                                                                                       | Methods:<br>Statistical<br>analysis              |
|                              |     | (d) If applicable, explain how matching of cases and controls was addressed                                                                                                                       | N/A                                              |
|                              |     | (e) Describe any sensitivity analyses                                                                                                                                                             | Methods:<br>Statistical<br>analysis              |
| <b>Results</b>               |     |                                                                                                                                                                                                   |                                                  |
| Participants                 | 13* | (a) Report numbers of individuals at each stage of study—eg numbers potentially eligible, examined for eligibility, confirmed eligible, included in the study, completing follow-up, and analysed | Figure 1                                         |
|                              |     | (b) Give reasons for non-participation at each stage                                                                                                                                              | Figure 1                                         |
|                              |     | (c) Consider use of a flow diagram                                                                                                                                                                | Figure 1                                         |
| Descriptive data             | 14* | (a) Give characteristics of study participants (eg demographic, clinical, social) and information on exposures and potential confounders                                                          | Table 1                                          |
|                              |     | (b) Indicate number of participants with missing data for each variable of interest                                                                                                               | Supplementary<br>Table 2                         |

|                          |     |                                                                                                                                                                                                              |                                                            |
|--------------------------|-----|--------------------------------------------------------------------------------------------------------------------------------------------------------------------------------------------------------------|------------------------------------------------------------|
| Outcome data             | 15* | Report numbers in each exposure category, or summary measures of exposure                                                                                                                                    | Table 2                                                    |
| Main results             | 16  | (a) Give unadjusted estimates and, if applicable, confounder-adjusted estimates and their precision (eg, 95% confidence interval). Make clear which confounders were adjusted for and why they were included | Results:<br>Abnormalities                                  |
|                          |     | (b) Report category boundaries when continuous variables were categorized                                                                                                                                    | N/A                                                        |
|                          |     | (c) If relevant, consider translating estimates of relative risk into absolute risk for a meaningful time period                                                                                             | N/A                                                        |
| Other analyses           | 17  | Report other analyses done—eg analyses of subgroups and interactions, and sensitivity analyses                                                                                                               | Results:<br>Abnormalities,<br>Lateralisation,<br>Pathology |
| <b>Discussion</b>        |     |                                                                                                                                                                                                              |                                                            |
| Key results              | 18  | Summarise key results with reference to study objectives                                                                                                                                                     | Discussion                                                 |
| Limitations              | 19  | Discuss limitations of the study, taking into account sources of potential bias or imprecision. Discuss both direction and magnitude of any potential bias                                                   | Discussion                                                 |
| Interpretation           | 20  | Give a cautious overall interpretation of results considering objectives, limitations, multiplicity of analyses, results from similar studies, and other relevant evidence                                   | Discussion                                                 |
| Generalisability         | 21  | Discuss the generalisability (external validity) of the study results                                                                                                                                        | Discussion                                                 |
| <b>Other information</b> |     |                                                                                                                                                                                                              |                                                            |
| Funding                  | 22  | Give the source of funding and the role of the funders for the present study and, if applicable, for the original study on which the present article is based                                                | Funding                                                    |

Table S3: Comparison of patients with observed and missing valid MRI scan reports

| Variable                | Patients with a valid MRI scan (N=790) | Patients without a valid MRI scan (N=25,622) |
|-------------------------|----------------------------------------|----------------------------------------------|
| Age at index, mean (SD) | 43.9 (19.8)                            | 40.2 (17.0)                                  |
| Sex, n (%)              |                                        |                                              |
| - Male                  | 439 (3.1)                              | 13,859 (96.9)                                |
| - Female                | 351 (2.9)                              | 11,759 (97.1)                                |
| - Not stated            | 0 (0.0)                                | 4 (0.0)                                      |
| Ethnicity, n (%)        |                                        |                                              |
| - White                 | 410 (2.6)                              | 15,427 (97.4)                                |

|                 |           |              |
|-----------------|-----------|--------------|
| - Black         | 275 (4.0) | 6,541 (96.0) |
| - Asian         | 49 (3.5)  | 1,335 (96.5) |
| - Mixed / Other | 48 (2.4)  | 1,934 (97.6) |
| - Not stated    | 8 (2.0)   | 385 (98.0)   |

Table S4: MRI scan abnormalities by diagnostic group

| Primary diagnosis                             | Catatonia group |                       | Comparison group |                       |
|-----------------------------------------------|-----------------|-----------------------|------------------|-----------------------|
|                                               | Total <i>n</i>  | Abnormal <i>n</i> (%) | Total <i>n</i>   | Abnormal <i>n</i> (%) |
| <b>Organic or neurodevelopmental disorder</b> | 3               | 3 (100)               | 124              | 102 (82)              |
| <b>Schizophrenia and related disorders</b>    | 50              | 14 (28)               | 266              | 92 (35)               |
| <b>Mood disorders</b>                         | 12              | 6 (50)                | 143              | 71 (50)               |
| <b>Neurotic disorders</b>                     | 3               | 1 (33)                | 31               | 14 (45)               |
| <b>Personality and behavioural disorders</b>  | 5               | 2 (40)                | 31               | 8 (24)                |
| <b>Substance use disorder</b>                 | 2               | 0 (0)                 | 45               | 27 (60)               |
| <b>Not stated</b>                             | 4               | 1 (25)                | 69               | 24 (35)               |
